# Supplementary material for: Novel two-dimensional ferromagnetic semiconductors: Ga-based transition-metal trichalcogenide monolayers
Source: Royal Society of Chemistry journal article supplement (doi:10.1039/c7cp07912e), 2018-01-01
Supplement: c7cp07912e1.pdf [file c7cp07912e1.pdf]

Supporting Information for ‘Novel two-dimensional ferromagnetic semiconductors:  
Ga-based transition-metal trichalcogenide monolayers’

Maolin Yu, Xiaofei Liu, and Wanlin Guo\*

*State Key Laboratory of Mechanics and Control of Mechanical Structures and Key  
Laboratory for Intelligent Nano Materials and Devices of Ministry of Education,  
Nanjing University of Aeronautics and Astronautics,  
Nanjing 210016, China*

*\*Address correspondence to [wlguo@nuaa.edu.cn](mailto:wlguo@nuaa.edu.cn).*

The phonon band along the  $\Gamma$ -Y direction of the AFM-Z configuration in CrGaTe<sub>3</sub> monolayer and the biggest imaginary mode are shown in Fig. S1. The largest instability mode is located at the K-point (0, 0.33, 0), which involves the collective vertical vibration and the relative in-plane vibration of the atoms in the two sides. Accordingly, we have optimized the  $1 \times 3$  supercell but not found a lower energy atomic structure in AFM-Z phase, demonstrating the AFM-Z state is a local energy minimum point and the substrate may support the stability of the AFM-Z configuration.

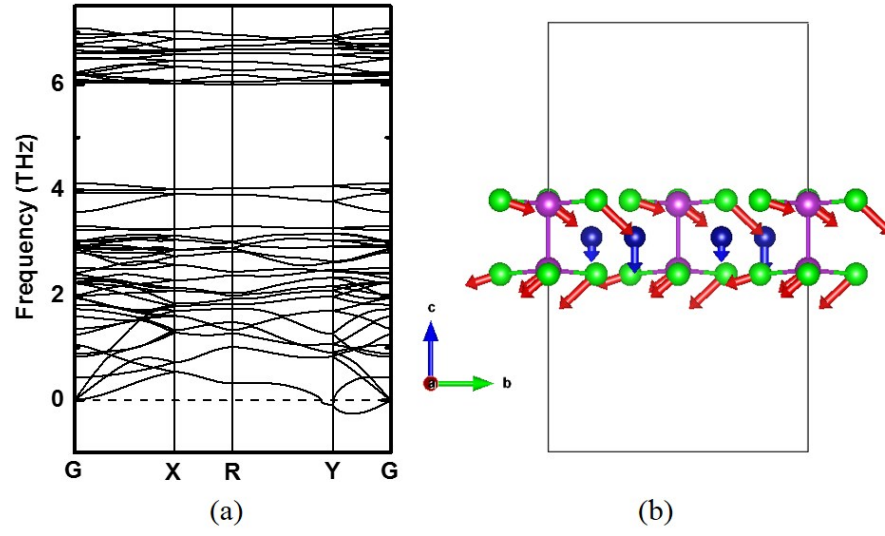

Fig. S1 (a) Phonon dispersion curve of CrGaTe<sub>3</sub> monolayer in AFM-Z configuration.

(b) Displacement vectors of the biggest imaginary mode in the K-point (0, 0.33, 0).

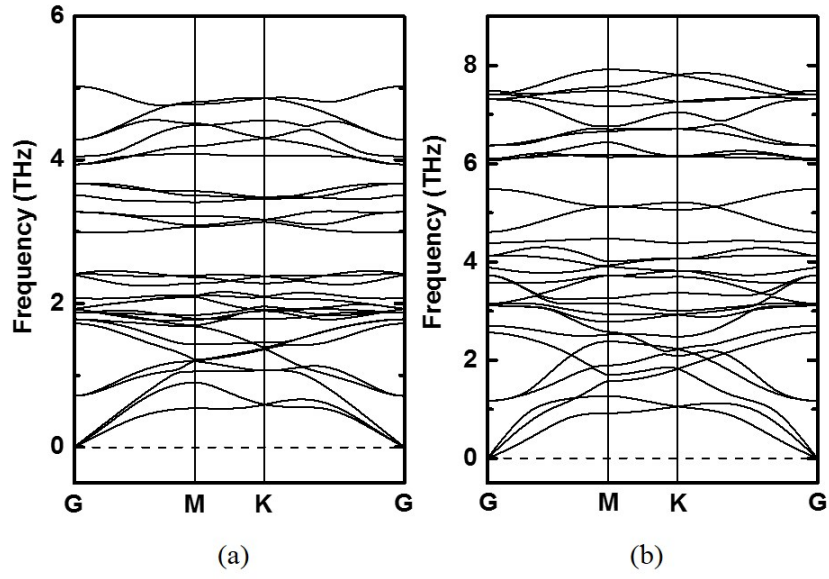

Fig. S2 Phonon band structures of ferromagnetic monolayer (a) CrGaTe<sub>3</sub> and (b) CrGaSe<sub>3</sub> under 5% tensile strain

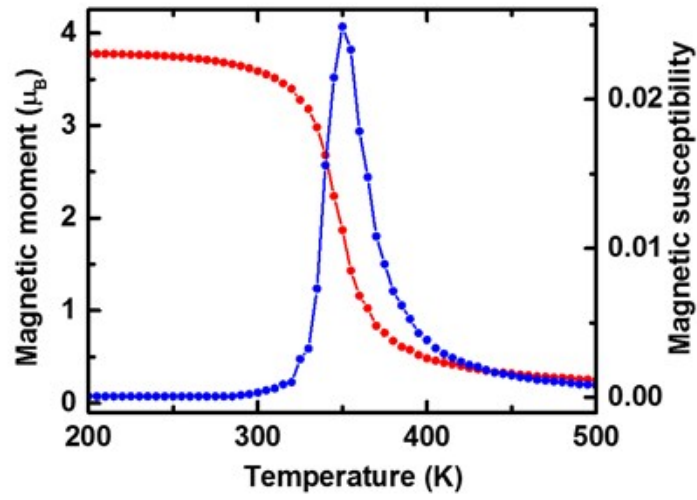

Fig. S3 The magnetic moment per Cr atom and magnetic susceptibility of CrGaTe<sub>3</sub> monolayer as a function of temperature under 8% tensile strain.
